# Supplementary material
Source: PubMed Central journal article supplement (PMC2518979)
Supplement: NIHMS59299-supplement-2.pdf [file NIHMS59299-supplement-2.pdf]

**Table 1. Levels of POB-DNA adducts in liver DNA <sup>a</sup>**

**A. NNK**

| Time (weeks) | POB-DNA adducts (fmol/mg DNA) |                             |            |                             |                         |                             | Total Adduct Levels <sup>c</sup> |
|--------------|-------------------------------|-----------------------------|------------|-----------------------------|-------------------------|-----------------------------|----------------------------------|
|              | O <sup>2</sup> -POB-dThd      |                             | 7-POB-Gua  |                             | O <sup>2</sup> -POB-Cyt |                             |                                  |
|              | Mean± SD                      | Percentage (%) <sup>b</sup> | Mean± SD   | Percentage (%) <sup>b</sup> | Mean ± SD               | Percentage (%) <sup>b</sup> |                                  |
| 1            | 650 ± 121                     | 49.6%                       | 490 ± 104  | 37.4%                       | 170 ± 43                | 13.0%                       | 1310                             |
| 2            | 1230 ± 272                    | 54.7%                       | 880 ± 182  | 39.1%                       | 140 ± 25                | 6.2%                        | 2250                             |
| 5            | 2190 ± 174                    | 62.9%                       | 1050 ± 90  | 30.2%                       | 240 ± 17                | 6.9%                        | 3480                             |
| 10           | 3740 ± 1169                   | 64.7%                       | 1460 ± 625 | 25.3%                       | 580 ± 214               | 10.0%                       | 5780                             |
| 16           | 3540 ± 643                    | 70.0%                       | 1170 ± 86  | 23.1%                       | 350 ± 152               | 6.9%                        | 5060                             |
| 20           | 2680 ± 643                    | 68.7%                       | 730 ± 225  | 18.7%                       | 490 ± 146               | 12.6%                       | 3900                             |

**B. (R)-NNAL**

| Time (weeks) | POB-DNA adducts (fmol/mg DNA) |                             |           |                             |                         |                             | Total Adduct Levels <sup>c</sup> |
|--------------|-------------------------------|-----------------------------|-----------|-----------------------------|-------------------------|-----------------------------|----------------------------------|
|              | O <sup>2</sup> -POB-dThd      |                             | 7-POB-Gua |                             | O <sup>2</sup> -POB-Cyt |                             |                                  |
|              | Mean± SD                      | Percentage (%) <sup>b</sup> | Mean± SD  | Percentage (%) <sup>b</sup> | Mean ± SD               | Percentage (%) <sup>b</sup> |                                  |
| 1            | 70 ± 15                       | 63.6%                       | 40 ± 12   | 36.4%                       | 0                       | 0.0%                        | 110                              |
| 2            | 90 ± 4                        | 60.0%                       | 60 ± 12   | 40.0%                       | 0                       | 0.0%                        | 150                              |
| 5            | 140 ± 11                      | 77.8%                       | 40 ± 11   | 22.2%                       | 20 ± 9                  | 0.0%                        | 180                              |
| 10           | 270 ± 101                     | 79.4%                       | 50 ± 20   | 14.7%                       | 0                       | 5.9%                        | 340                              |
| 16           | 260 ± 92                      | 83.9%                       | 50 ± 31   | 16.1%                       | 0                       | 0.0%                        | 310                              |
| 20           | 200 ± 47                      | 83.3%                       | 40 ± 5    | 16.7%                       | 0                       | 0.0%                        | 240                              |

**C. (S)-NNAL**

| Time (weeks) | POB-DNA adducts (fmol/mg DNA) |                             |           |                             |                         |                             | Total Adduct Levels <sup>c</sup> |
|--------------|-------------------------------|-----------------------------|-----------|-----------------------------|-------------------------|-----------------------------|----------------------------------|
|              | O <sup>2</sup> -POB-dThd      |                             | 7-POB-Gua |                             | O <sup>2</sup> -POB-Cyt |                             |                                  |
|              | Mean± SD                      | Percentage (%) <sup>b</sup> | Mean± SD  | Percentage (%) <sup>b</sup> | Mean ± SD               | Percentage (%) <sup>b</sup> |                                  |
| 1            | 990 ± 361                     | 52.4%                       | 660 ± 231 | 34.9%                       | 240 ± 95                | 12.7%                       | 1890                             |
| 2            | 1100 ± 121                    | 61.1%                       | 590 ± 106 | 32.8%                       | 110 ± 20                | 6.1%                        | 1800                             |
| 5            | 1910 ± 378                    | 68.5%                       | 680 ± 94  | 24.4%                       | 200 ± 44                | 7.2%                        | 2790                             |
| 10           | 2700 ± 301                    | 74.2%                       | 690 ± 68  | 19.0%                       | 250 ± 17                | 6.9%                        | 3640                             |
| 16           | 2530 ± 360                    | 68.8%                       | 920 ± 58  | 25.0%                       | 230 ± 38                | 6.3%                        | 3680                             |
| 20           | 1910 ± 243                    | 69.7%                       | 470 ± 86  | 17.2%                       | 360 ± 47                | 13.1%                       | 2740                             |

- a. Each value is the mean ± S.D. of single analyses of DNA samples isolated from three rats per group at each time point.
- b. The percentage was calculated by dividing the mean level of each adduct by total adduct levels.
- c. The value for total adduct levels is the sum of the mean levels of three POB-DNA adducts and rounded.

**Table 2. Levels of POB-DNA adducts in lung DNA <sup>a</sup>**

**A. NNK**

| Time (weeks) | POB-DNA adducts (fmol/mg DNA) |                             |            |                             |                         |                             |                          |                             |                                  |
|--------------|-------------------------------|-----------------------------|------------|-----------------------------|-------------------------|-----------------------------|--------------------------|-----------------------------|----------------------------------|
|              | O <sup>2</sup> -POB-dThd      |                             | 7-POB-Gua  |                             | O <sup>2</sup> -POB-Cyt |                             | O <sup>6</sup> -POB-dGuo |                             | Total Adduct Levels <sup>c</sup> |
|              | Mean ± SD                     | Percentage (%) <sup>b</sup> | Mean ± SD  | Percentage (%) <sup>b</sup> | Mean ± SD               | Percentage (%) <sup>b</sup> | Mean ± SD                | Percentage (%) <sup>b</sup> |                                  |
| 1            | 1080 ± 99                     | 51.1%                       | 750 ± 95   | 35.5%                       | 240 ± 23                | 11.3%                       | 45 ± 7                   | 2.1%                        | 2120                             |
| 2            | 2020 ± 150                    | 57.7%                       | 1180 ± 131 | 33.7%                       | 250 ± 18                | 7.1%                        | 50 ± 5                   | 1.4%                        | 3500                             |
| 5            | 3890 ± 648                    | 68.3%                       | 1360 ± 214 | 23.9%                       | 400 ± 87                | 7.0%                        | 46 ± 13                  | 0.8%                        | 5700                             |
| 10           | 8260 ± 2731                   | 73.4%                       | 2220 ± 864 | 19.7%                       | 730 ± 211               | 6.5%                        | 44 ± 14                  | 0.4%                        | 11250                            |
| 16           | 6720 ± 606                    | 72.5%                       | 1700 ± 175 | 18.4%                       | 810 ± 152               | 8.7%                        | 34 ± 17                  | 0.4%                        | 9260                             |
| 20           | 5070 ± 1057                   | 71.5%                       | 1060 ± 169 | 15.0%                       | 940 ± 175               | 13.3%                       | 20 ± 5                   | 0.3%                        | 7090                             |

**B. (R)-NNAL**

| Time (weeks) | POB-DNA adducts (fmol/mg DNA) |                             |           |                             |                         |                             |                          |                             |                                  |
|--------------|-------------------------------|-----------------------------|-----------|-----------------------------|-------------------------|-----------------------------|--------------------------|-----------------------------|----------------------------------|
|              | O <sup>2</sup> -POB-dThd      |                             | 7-POB-Gua |                             | O <sup>2</sup> -POB-Cyt |                             | O <sup>6</sup> -POB-dGuo |                             | Total Adduct Levels <sup>c</sup> |
|              | Mean ± SD                     | Percentage (%) <sup>b</sup> | Mean ± SD | Percentage (%) <sup>b</sup> | Mean ± SD               | Percentage (%) <sup>b</sup> | Mean ± SD                | Percentage (%) <sup>b</sup> |                                  |
| 1            | 100 ± 8                       | 51.8%                       | 60 ± 4    | 31.1%                       | 30 ± 11                 | 15.5%                       | 3 ± 0                    | 1.6%                        | 190                              |
| 2            | 160 ± 13                      | 56.7%                       | 100 ± 10  | 35.5%                       | 20 ± 2                  | 7.1%                        | 2 ± 1                    | 0.7%                        | 280                              |
| 5            | 280 ± 18                      | 67.8%                       | 100 ± 3   | 24.2%                       | 30 ± 5                  | 7.3%                        | 3 ± 0                    | 0.7%                        | 410                              |
| 10           | 790 ± 38                      | 75.7%                       | 200 ± 17  | 19.2%                       | 50 ± 8                  | 4.8%                        | 3 ± 0                    | 0.3%                        | 1040                             |
| 16           | 630 ± 35                      | 78.8%                       | 130 ± 11  | 16.3%                       | 40 ± 12                 | 5.0%                        | 0                        | 0.0%                        | 800                              |
| 20           | 480 ± 18                      | 75.0%                       | 100 ± 11  | 15.6%                       | 60 ± 10                 | 9.4%                        | 0                        | 0.0%                        | 640                              |

**C. (S)-NNAL**

| Time (weeks) | POB-DNA adducts (fmol/mg DNA) |                             |            |                             |                         |                             |                          |                             |                                  |
|--------------|-------------------------------|-----------------------------|------------|-----------------------------|-------------------------|-----------------------------|--------------------------|-----------------------------|----------------------------------|
|              | O <sup>2</sup> -POB-dThd      |                             | 7-POB-Gua  |                             | O <sup>2</sup> -POB-Cyt |                             | O <sup>6</sup> -POB-dGuo |                             | Total Adduct Levels <sup>c</sup> |
|              | Mean ± SD                     | Percentage (%) <sup>b</sup> | Mean ± SD  | Percentage (%) <sup>b</sup> | Mean ± SD               | Percentage (%) <sup>b</sup> | Mean ± SD                | Percentage (%) <sup>b</sup> |                                  |
| 1            | 1410 ± 304                    | 50.2%                       | 960 ± 222  | 34.2%                       | 390 ± 102               | 13.9%                       | 50 ± 13                  | 1.8%                        | 2810                             |
| 2            | 1980 ± 126                    | 58.2%                       | 1150 ± 64  | 33.8%                       | 230 ± 21                | 6.8%                        | 40 ± 5                   | 1.2%                        | 3400                             |
| 5            | 3340 ± 141                    | 70.5%                       | 1080 ± 39  | 22.8%                       | 290 ± 11                | 6.1%                        | 30 ± 2                   | 0.6%                        | 4740                             |
| 10           | 5120 ± 608                    | 76.1%                       | 1160 ± 193 | 17.2%                       | 420 ± 58                | 6.2%                        | 30 ± 4                   | 0.4%                        | 6730                             |
| 16           | 6400 ± 355                    | 73.3%                       | 1520 ± 94  | 17.4%                       | 790 ± 87                | 9.0%                        | 20 ± 6                   | 0.2%                        | 8730                             |
| 20           | 4980 ± 65                     | 69.8%                       | 1110 ± 75  | 15.6%                       | 1020 ± 73               | 14.3%                       | 20 ± 2                   | 0.3%                        | 7130                             |

- a. Each value is the mean ± S.D. of single analyses of DNA samples isolated from three rats per group at each time point.
- b. The percentage was calculated by dividing the mean level of each adduct by total adduct levels.
- c. The value for total adduct levels is the sum of the mean levels of four POB-DNA adducts and rounded.

**Table 3. Levels of POB-DNA adducts in rats treated with NNK, (R)-NNAL or (S)-NNAL for 20 weeks <sup>a</sup>**

| Tissue   | Group | O <sup>2</sup> -POB-dThd (fmol/μmol dThd) <sup>b</sup> | O <sup>2</sup> -POB-Cyt (fmol/μmol dCyd) <sup>b</sup> | 7-POB-Gua (fmol/μmol dGuo) <sup>b</sup> |
|----------|-------|--------------------------------------------------------|-------------------------------------------------------|-----------------------------------------|
| NNK      | liver | 4180 ± 967                                             | 830 ± 208                                             | 1100 ± 341                              |
|          | lung  | 6450 ± 1351                                            | 1820 ± 336                                            | 1610 ± 256                              |
| (R)-NNAL | liver | 310 ± 74                                               | 0                                                     | 60 ± 8                                  |
|          | lung  | 550 ± 88                                               | 90 ± 29                                               | 150 ± 16                                |
| (S)-NNAL | liver | 2730 ± 615                                             | 660 ± 63                                              | 720 ± 130                               |
|          | lung  | 6420 ± 82                                              | 1990 ± 135                                            | 1680 ± 113                              |

a. Each value is the mean ± S.D. of single analyses of DNA samples isolated from three rats per group at each time point.

b. Levels of each POB-DNA adduct were expressed as fmol per appropriate μmol nucleoside. Contents of dGuo, dThd and dCyd were determined by HPLC.

**Table 4. Statistical comparison of levels of each individual POB-DNA adduct in liver and lung of rats treated with NNK, (R)-NNAL, or (S)-NNAL <sup>a</sup>**

**A. NNK**

| Time (weeks) | Liver                                   |                             |                 | Lung            |                 |                 |                             |                 |                 |
|--------------|-----------------------------------------|-----------------------------|-----------------|-----------------|-----------------|-----------------|-----------------------------|-----------------|-----------------|
|              | <b>13<sup>b</sup> vs 16<sup>b</sup></b> | <b>13 vs 17<sup>b</sup></b> | <b>16 vs 17</b> | <b>13 vs 16</b> | <b>13 vs 17</b> | <b>16 vs 17</b> | <b>12<sup>b</sup> vs 13</b> | <b>12 vs 16</b> | <b>12 vs 17</b> |
| 1            | NS <sup>c</sup>                         | <i>P</i> <0.01              | <i>P</i> <0.01  | <i>P</i> <0.01  | <i>P</i> <0.01  | <i>P</i> <0.01  | <i>P</i> <0.01              | <i>P</i> <0.01  | <i>P</i> <0.01  |
| 2            | <i>P</i> <0.01                          | <i>P</i> <0.01              | <i>P</i> <0.01  | <i>P</i> <0.01  | <i>P</i> <0.01  | <i>P</i> <0.01  | <i>P</i> <0.01              | <i>P</i> <0.01  | <i>P</i> <0.01  |
| 5            | <i>P</i> <0.01                          | <i>P</i> <0.01              | <i>P</i> <0.01  | <i>P</i> <0.01  | <i>P</i> <0.01  | <i>P</i> <0.01  | <i>P</i> <0.01              | <i>P</i> <0.01  | <i>P</i> <0.01  |
| 10           | <i>P</i> <0.01                          | <i>P</i> <0.01              | <i>P</i> <0.01  | <i>P</i> <0.01  | <i>P</i> <0.01  | <i>P</i> <0.01  | <i>P</i> <0.01              | <i>P</i> <0.01  | <i>P</i> <0.01  |
| 16           | <i>P</i> <0.01                          | <i>P</i> <0.01              | <i>P</i> <0.01  | <i>P</i> <0.01  | <i>P</i> <0.01  | NS              | <i>P</i> <0.01              | <i>P</i> <0.01  | <i>P</i> <0.01  |

**B. (R)-NNAL**

| Time (weeks) | Liver           | Lung            |                 |                 |                 |                 |                 |
|--------------|-----------------|-----------------|-----------------|-----------------|-----------------|-----------------|-----------------|
|              | <b>13 vs 16</b> | <b>13 vs 16</b> | <b>13 vs 17</b> | <b>16 vs 17</b> | <b>12 vs 13</b> | <b>12 vs 16</b> | <b>12 vs 17</b> |
| 1            | NS              | <i>P</i> <0.01  |
| 2            | NS              | <i>P</i> <0.01  |
| 5            | <i>P</i> <0.01  |
| 10           | NS              | <i>P</i> <0.01  |
| 16           | NS              | <i>P</i> <0.01  | <i>P</i> <0.01  | <i>P</i> <0.01  | NA <sup>d</sup> | NA              | NA              |
| 20           | <i>P</i> <0.01  | <i>P</i> <0.01  | <i>P</i> <0.01  | <i>P</i> <0.01  | NA              | NA              | NA              |

**C. (S)-NNAL**

| Time (weeks) | Liver           |                 |                 | Lung            |                 |                 |                 |                 |                 |
|--------------|-----------------|-----------------|-----------------|-----------------|-----------------|-----------------|-----------------|-----------------|-----------------|
|              | <b>13 vs 16</b> | <b>13 vs 17</b> | <b>16 vs 17</b> | <b>13 vs 16</b> | <b>13 vs 17</b> | <b>16 vs 17</b> | <b>12 vs 13</b> | <b>12 vs 16</b> | <b>12 vs 17</b> |
| 1            | NS              | <i>P</i> <0.01  |
| 2            | <i>P</i> <0.01  |
| 5            | <i>P</i> <0.01  |
| 10           | <i>P</i> <0.01  |
| 16           | <i>P</i> <0.01  |
| 20           | <i>P</i> <0.01  | NS              | <i>P</i> <0.01  | <i>P</i> <0.01  | <i>P</i> <0.01  |

a. A repeated measures analysis of variance was used to compare each adduct within each group at each time point.

b. Compound **12**: *O*<sup>6</sup>-POB-dGuo; **13**: *O*<sup>2</sup>-POB-dThd; **16**: 7-POB-Gua; **17**: *O*<sup>2</sup>-POB-Cyt.

c. NS: no significant difference (*P* > 0.01)

d. NA: not available due to level of *O*<sup>6</sup>-POB-dGuo below the limit of detection of HPLC-ESI-MS/MS analysis
